# Supplementary material for: Durability and effectiveness of insecticide-treated nets in Mali: A longitudinal gSG6-P1 biomarker-based assessment of children’s exposure to Anopheles bites
Source: Research Square preprint supplement (doi:10.21203/rs.3.rs-7383572/v1), 2025-11-04
Supplement: Supplementary file 1 [file 2bc355bd0723f0b57c0c2e34.docx]

Supplementary Table 1. Technical specifications of ITN brand monitored

| Distribution Site | Brand | Material | Denier | Shape | Insecticide content | Binding technology |
| --- | --- | --- | --- | --- | --- | --- |
| Kéniéba | Yorkool® | Polyester | 75 | Rectangular | Deltamethrin 55 mg / m2 | Polymer-incorporated |
| Kita | Permanet® 2.0 | Polyester | 100 | Rectangular | Deltamethrin 55 mg / m2 | Surface-coated |
