# Supplementary material for: Durability and effectiveness of insecticide-treated nets in Mali: A longitudinal gSG6-P1 biomarker-based assessment of children’s exposure to Anopheles bites
Source: Research Square preprint supplement (doi:10.21203/rs.3.rs-7383572/v1), 2025-11-04
Supplement: Supplementary file 2 [file 7ca14328860c325fef493001.docx]

Table 2. Socio-demographic characteristics of the study population by study site

|  | | Site 1 Kéniéba | | | Chi-squared (*p-value*) | Site 2 Kita | | | Chi-squared (p-value) |
| --- | --- | --- | --- | --- | --- | --- | --- | --- | --- |
| Variable | | Yorkool® | | | PermaNet® 2.0 | | |
|  | | 12 month (N=119) | 24 month (N=61) | 36 month (N=45) |  | 12 month (N=117) | 24 month (N=123) | 36 month (N=121) |  |
| Sex | Female | 50 (42%) | 27 (44%) | 17 (38%) | *0.453 (0.797)* | 61 (52%) | 62 (50%) | 65 (54%) | *0.268 (0.874)* |
| Male | 69 (58%) | 34 (56%) | 28 (62%) | 56 (48%) | 61 (50%) | 56 (46%) |
| Age (in months) | <12 | 20 (16.8%) | 7 (11.5%) | 2 (4.4%) | *27.82 (0.001)* | 11 (9.4%) | 6 (4.9%) | 8 (6.6%) | *24.22 (0.002)* |
| 12_23 | 29 (24.4%) | 4 (6.6%) | 6 (13.6%) | 12 (10.3%) | 36 (29.2%) | 15 (12.3%) |
| 24 - 35 | 19 (15.9%) | 17 (27.9%) | 7 (15.5%) | 25 (21.3%) | 23 (18.7%) | 30 (24.7%) |
| 36 - 47 | 28 (23.5%) | 13 (21.3%) | 21 (46.6%) | 28 (23.9%) | 33 (26.8%) | 28 (23.1%) |
| 48 - 60 | 20 (16.8%) | 20 (32.8%) | 8 (17.7%) | 40 (34.1%) | 23 (18.7%) | 38 (31.4%) |
| NA | 3 (2.5%) | 0 | 1 (2.22%) | 1 (0.8%) | 2 (1.6%) | 2 (1.6%) |
| ITN assesment | | N=245 | N=144 | N=45 |  | N=305 | N=147 | N=99 |  |
| % in Serviceable condition (pHI≤ 642) | | 84,90% | 70,30% | 48,80% | *22.32 (<0.0001)* | 95,40% | 91,80% | 77,70% | *19.31 (<0.0001)* |
| % in Good condition (pHI < 64) | | 65,70% | 47,20% | 33,30% | *15.15 (0.0005)* | 92,70% | 71,40% | 63,60% | *26.97 (<0.0001)* |
| % Too torn (pHI > 642) | | 15,10% | 29,10% | 51,10% | *22.32 (<0.0001)* | 4,50% | 8,10% | 22,20% | *19.31 (<0.0001)* |
| ITN ownership (Parent) | |  | | | | | | | |
| No | | 0% | 0% | 0% | *0 (1)* | 0% | 0% | 0% | *0 (1)* |
| Yes | | 100% | 100% | 100% | 100% | 100% | 100% |
| ITN use Last night | |  | | | | | | | |
| No | | 28 (23.5%) | 8 (13.1%) | 2 (4.4%) | *9.36 (0.009)* | 5 (4.3%) | 7 (5.6%) | 0 (0%) | *6.67 (0.035)* |
| Yes | | 90 (75.6%) | 52 (85.2%) | 43 (95.6%) | 112 (95.7%) | 114 (92.6%) | 120 (99.1%) |
| NA | | 1 (0.8%) | 1 (1.6%) | 0 | 0 | 2 (1.6%) | 1 (0.9%) |
| # time in a week | |  | | | | | | | |
| 0 (Never) | | 25 (21%) | 6 (9.8%) | 2 (4.4%) | *12.89 (0.045)* | 3 (2.6%) | 2 (1.6%) | 1 (0.8%) | *10.16 (0.118)* |
| 1-6 (Often) | | 8 (6.7%) | 4 (6.5%) | 0 (0%) | 1 (0.8%) | 6 (4.9%) | 0 (0%) |
| 7 (Every day) | | 86 (72.3%) | 50 (81.9%) | 43 (95.6%) | 113 (96.6%) | 115 (93.5%) | 120 (99.2%) |
| NA | | 0 | 1 (1.6%) | 0 | 0 | 0 | 0 |
